# Supplementary material for: Changes in the proteomic profile of adipose tissue-derived mesenchymal stem cells during passages
Source: PubMed Central journal article supplement (PMC3499380; doi:10.1186/1477-5956-10-46), 2012-07-24
Supplement: 1477-5956-10-46-S1.pdf [file 1477-5956-10-46-S1.pdf]

**Additional file 1. Differentially expressed peaks from different donors during subculturing passages detected in nuclear fraction by SELDI-ToF-MS.**

| <b>Mass/charge ratio</b> | <b>Intensity average</b> | <b>p-Value</b> | <b>Mass/charge ratio</b> | <b>Intensity average</b> | <b>p-Value</b> |
|--------------------------|--------------------------|----------------|--------------------------|--------------------------|----------------|
| 8163,4                   | 20,9                     | 0,01138        | 6839,8                   | 18,3                     | 0,11699        |
| 9515,4                   | 22,0                     | 0,01398        | 4946,3                   | 45,1                     | 0,11952        |
| 7960,7                   | 33,7                     | 0,01639        | 4316,7                   | 98,9                     | 0,12210        |
| 11651,5                  | 156,7                    | 0,01792        | 8280,1                   | 10,6                     | 0,13517        |
| 11727,5                  | 116,4                    | 0,01810        | 4197,2                   | 13,6                     | 0,14882        |
| 11828,1                  | 33,7                     | 0,01910        | 4729,7                   | 12,7                     | 0,15006        |
| 14706,0                  | 18,1                     | 0,02017        | 6725,0                   | 16,4                     | 0,15640        |
| 6280,4                   | 21,3                     | 0,02046        | 4058,3                   | 37,4                     | 0,15965        |
| 8089,2                   | 58,1                     | 0,02097        | 9085,4                   | 36,5                     | 0,16230        |
| 9229,5                   | 18,6                     | 0,02335        | 6798,1                   | 19,0                     | 0,16363        |
| 4971,4                   | 82,2                     | 0,02369        | 3525,0                   | 9,9                      | 0,17046        |
| 7884,4                   | 87,1                     | 0,02499        | 6330,7                   | 14,2                     | 0,17255        |
| 14779,6                  | 18,4                     | 0,02598        | 11072,2                  | 70,0                     | 0,17255        |
| 6303,5                   | 18,9                     | 0,02807        | 6370,3                   | 12,9                     | 0,20019        |
| 12649,8                  | 5,5                      | 0,02960        | 3997,3                   | 14,3                     | 0,20663        |
| 12276,8                  | 16,0                     | 0,03090        | 6596,1                   | 18,4                     | 0,21491        |
| 5830,8                   | 46,6                     | 0,03226        | 6351,2                   | 16,0                     | 0,22086        |
| 3659,2                   | 3,7                      | 0,03515        | 3236,1                   | 18,0                     | 0,25075        |
| 5795,5                   | 19,6                     | 0,03532        | 8565,5                   | 46,2                     | 0,27035        |
| 5654,5                   | 80,1                     | 0,03583        | 10167,0                  | 92,2                     | 0,29111        |
| 9153,6                   | 32,7                     | 0,04129        | 7014,9                   | 11,2                     | 0,29325        |
| 3362,7                   | 21,4                     | 0,04148        | 3582,6                   | 3,6                      | 0,29432        |
| 6981,4                   | 14,4                     | 0,04148        | 3751,9                   | 9,4                      | 0,29648        |
| 10271,8                  | 31,4                     | 0,04227        | 9742,3                   | 7,5                      | 0,30522        |
| 4897,6                   | 15,7                     | 0,04472        | 7468,2                   | 4,1                      | 0,30633        |
| 12496,7                  | 10,8                     | 0,04685        | 13778,4                  | 29,2                     | 0,35793        |
| 7391,5                   | 9,0                      | 0,05047        | 12170,5                  | 9,4                      | 0,36415        |
| 5361,7                   | 35,0                     | 0,05118        | 9697,8                   | 3,9                      | 0,38067        |
| 6652,8                   | 22,8                     | 0,05214        | 9293,5                   | 7,1                      | 0,38325        |
| 5633,7                   | 54,2                     | 0,05287        | 11305,5                  | 70,2                     | 0,39766        |
| 7932,4                   | 25,3                     | 0,05744        | 7413,0                   | 6,6                      | 0,42197        |
| 10352,9                  | 19,7                     | 0,05744        | 7004,2                   | 16,1                     | 0,42749        |
| 10840,7                  | 28,4                     | 0,05877        | 10091,0                  | 130,8                    | 0,43726        |
| 13437,5                  | 5,3                      | 0,06041        | 14004,8                  | 24,1                     | 0,44148        |
| 8960,7                   | 32,2                     | 0,06068        | 7785,1                   | 13,0                     | 0,46876        |
| 7815,7                   | 15,6                     | 0,07018        | 11347,5                  | 39,7                     | 0,56013        |
| 6684,2                   | 17,3                     | 0,07146        | 5283,6                   | 5,0                      | 0,58395        |
| 5965,2                   | 24,4                     | 0,07542        | 4243,2                   | 10,4                     | 0,59356        |
| 7448,3                   | 9,5                      | 0,10056        | 8361,0                   | 9,6                      | 0,64695        |
| 6664,9                   | 18,0                     | 0,10920        | 7678,0                   | 5,1                      | 0,77670        |
| 11149,3                  | 54,6                     | 0,11352        | 6893,8                   | 15,8                     | 0,91075        |
